# Supplementary material
Source: PubMed Central journal article supplement (PMC2933364)
Supplement: NIHMS231509-supplement-2.pdf [file NIHMS231509-supplement-2.pdf]

were shown below the picture. The number labels in the bar graph correspond to the number labels in the picture. (C) IHC staining of tumor tissues treated with control or EphB4-131 antibody. Pictures of AKT, pAKT, S6, and phospho-S6 (Ser235/236) were taken at original magnification X200.

**Suppl Figure 1.** Downregulation of EphB4 with EphB4-131 in the A2780-cp20 ovarian cancer cell line was most significant at 72 hours (A). EphB4 siRNA effectively silenced EphB4 mRNA expression in the A2780-cp20 ovarian cancer cell line (B). EphB4 siRNA-DOPC used in mouse orthotopic ovarian cancer models is specific for the human sequence and does not affect mouse EphB4 (C). EphB4 mRNA levels show a persistent decrease in EphB4 expression at completion of the A2780-cp20 *in vivo* model (D).
